# Supplementary material
Source: PubMed Central journal article supplement (PMC7572596)
Supplement: NIHMS1599001-supplement-1.pdf [file NIHMS1599001-supplement-1.pdf]

| Strain                                | Genotype                                                                                                                                                                                                                                                      | Reference                      |
|---------------------------------------|---------------------------------------------------------------------------------------------------------------------------------------------------------------------------------------------------------------------------------------------------------------|--------------------------------|
| <b>BT5482</b>                         | WT <i>B. thetaiotaomicron</i> (gentamycin <sup>R</sup> )                                                                                                                                                                                                      | Lab stock.                     |
| <b>BT5482 <math>\Delta tdk</math></b> | As BT5482 with $\Delta tdk$                                                                                                                                                                                                                                   | (Koropatkin et al., 2008)      |
| <b>SM135 AKA HPX-</b>                 | As BT5482 $\Delta tdk \Delta katE1 \Delta ahpC1 \Delta rbr1-1 \Delta rbr2-1$                                                                                                                                                                                  | (Mishra & Imlay, 2013)         |
| <b>WM6026</b>                         | <i>E. coli laclq, rrnB3, DElacZ4787, hsdR514, DE(araBAD)567, DE(rhaBAD)568, rph-1 att-lambda::pAE12-del (oriR6K/cat::frit5), del 4229(dapA)::frit, del(endA)::frit, uidA(delMlul)::pir(wt), attHK::pJK1006::del1/2(del oriR6K-cat::frit5, del trfA::frit)</i> | (Blodgett, 2007)               |
| <b>BW19851</b>                        | <i>E. coli rp4-2(Km::Tn7, Tc::Mu-1) <math>\Delta uidA::pir+</math> recA1 hsdR17 creC510 endA1 thiE1</i>                                                                                                                                                       | (Metcalf, 1994)                |
| <b>Top10</b>                          | <i>F- mcrA <math>\Delta(mrr-hsdRMS-mcrBC) \phi 80lacZ\Delta M15 \Delta lacX74 recA1 araD139 \Delta(araA-leu)7697 galU galK rpsL endA1 nupG</math></i>                                                                                                         | Invitrogen #V43001             |
| <b>MK462</b>                          | As TOP10 with pBAD/His A/pfor of <i>B. thetaiotaomicron</i>                                                                                                                                                                                                   | This study                     |
| <b>MK466</b>                          | As BW19851 with pExchange- <i>pfl2955</i> (BT_2955)                                                                                                                                                                                                           | This study                     |
| <b>MK470</b>                          | As BW19851 with pExchange- <i>fdx</i> (BT_2414)                                                                                                                                                                                                               | This study                     |
| <b>MK474</b>                          | As BW19851 with pExchange- <i>pfor</i> (BT_1747)                                                                                                                                                                                                              | This study                     |
| <b>MK482</b>                          | As BW19851 with pExchange- <i>rnf</i> (BT_0616 to BT_0622 in <i>rnf</i> operon)                                                                                                                                                                               | This study                     |
| <b>MK486</b>                          | As BW19851 with pExchange- <i>hyd3472</i> (BT_3472)                                                                                                                                                                                                           | This study                     |
| <b>MK490</b>                          | As BW19851 with pExchange- <i>hyd1834</i> (BT_1834)                                                                                                                                                                                                           | This study                     |
| <b>MK494</b>                          | As BT5482 $\Delta tdk$ with $\Delta pfl2955$ (BT_2955)                                                                                                                                                                                                        | MK466 X<br>BT5482 $\Delta tdk$ |
| <b>MK500</b>                          | As BT5482 $\Delta tdk$ with $\Delta hyd3472$ (BT_3472)                                                                                                                                                                                                        | MK486 X<br>BT5482 $\Delta tdk$ |
| <b>MK508</b>                          | As BT5482 $\Delta tdk$ with $\Delta pfor$ (BT_1747)                                                                                                                                                                                                           | MK474 X<br>BT5482 $\Delta tdk$ |
| <b>MK520</b>                          | As BT5482 $\Delta tdk$ with $\Delta rnf$ (BT_0616 to BT_0622 in <i>rnf</i> operon)                                                                                                                                                                            | MK482 X<br>BT5482 $\Delta tdk$ |
| <b>MK526</b>                          | As BW19851 with pExchange- <i>pfl4738</i> (BT_4738)                                                                                                                                                                                                           | This study                     |
| <b>MK532</b>                          | As BT5482 $\Delta tdk$ with $\Delta fdx$ (BT_2414)                                                                                                                                                                                                            | MK470 X<br>BT5482 $\Delta tdk$ |
| <b>MK540</b>                          | As BT5482 $\Delta tdk$ with $\Delta hyd1834$ (BT_1834)                                                                                                                                                                                                        | MK622 X<br>BT5482 $\Delta tdk$ |
| <b>MK550</b>                          | As BT5482 $\Delta tdk$ with $\Delta pfl4738$ (BT_4738)                                                                                                                                                                                                        | MK526 X<br>BT5482 $\Delta tdk$ |
| <b>MK556</b>                          | As SM135 with $\Delta pfl4738$ (BT_4738)                                                                                                                                                                                                                      | MK526 X<br>SM135               |
| <b>MK562</b>                          | As SM135 with $\Delta pfl2955$ (BT_2955)                                                                                                                                                                                                                      | MK466 X<br>SM135               |

|                           |                                                                            |                      |
|---------------------------|----------------------------------------------------------------------------|----------------------|
| <b>MK570</b>              | As SM135 with $\Delta hyd1834$ (BT_1834)                                   | MK490 X<br>SM135     |
| <b>MK592</b>              | As SM135 with $\Delta pfor$ (BT_1747)                                      | MK474 X<br>SM135     |
| <b>MK580</b>              | As SM135 with $\Delta hyd3472$ (BT_3472)                                   | MK486 X<br>SM135     |
| <b>MK584</b>              | As SM135 with $\Delta rnf$ (BT_0616 to BT_0622 in <i>rnf</i> operon)       | MK482 X<br>SM135     |
| <b>MK616</b>              | As WM6026 with pExchange- <i>fdx</i> (BT_2414)                             | This study           |
| <b>MK624</b>              | As WM6026 with pExchange- <i>pfor</i> (BT_1747)                            | This study           |
| <b>MK626</b>              | As WM6026 with pExchange- <i>pfl4738</i> (BT_4738)                         | This study           |
| <b>MK628</b>              | As WM6026 with pExchange- <i>pfl2955</i> (BT_2955)                         | This study           |
| <b>MK630</b>              | As MK508 with $\Delta pfl2955$ (BT_2955)                                   | MK628 X<br>MK508     |
| <b>MK635</b>              | As MK550 with $\Delta pfor$ (BT_1747)                                      | MK624 X<br>MK550     |
| <b>MK644</b>              | As MK494 with $\Delta pfl4738$ (BT_4738)                                   | MK626 X<br>MK494     |
| <b>MK654</b>              | As SM135 with $\Delta fdx$ (BT_2424)                                       | MK616 X<br>SM135     |
| <b>MK622</b>              | As WM6026 with pExchange- <i>hyd1834</i> (BT_1834)                         | This study           |
| <b>LZ01 AKA<br/>SOD-</b>  | As BT5482 $\Delta tdk$ with $\Delta sod1$ (BT_0655)                        | (Lu et al.,<br>2018) |
| <b>LZ200 AKA<br/>pSOD</b> | As BT5482 $\Delta tdk$ with pNLY- <i>B.thetaiotaomicron sod1</i> (BT_0655) | lab stock            |
| <b>LZ62</b>               | As BT5482 $\Delta tdk$ with $\Delta fum$ (BT_2256)                         | (Lu et al.,<br>2018) |

873  
874  
875  
876  
877  
878

**Supplementary Table 1. The strains used in this study.**

| Plasmid                              | Genotype                                                                                                                                 | Reference                 |
|--------------------------------------|------------------------------------------------------------------------------------------------------------------------------------------|---------------------------|
| pExchange- <i>tdk</i>                | Derivative of pKNOCK- <i>bla-ermGb</i> carrying cloned <i>tdk</i>                                                                        | (Koropatkin et al., 2008) |
| pNLY- <i>sod</i> <sub>BT</sub>       | pNLY plasmid constitutively expressing <i>B. thetaiotaomicron</i> <i>sod</i> from its own promoter and RBS (520 bp upstream of the gene) | (Lu et al., 2018)         |
| pBAD/HisA- <i>pfor</i> <sub>BT</sub> | pBAD/HisA plasmid (Invitrogen, catalog number V430-01) overexpressing <i>pfor</i> gene from <i>B. thetaiotaomicron</i>                   | This study                |

879

880

881

882

883

884

885

**Supplementary Table 2. The plasmids used in this study.**

| Primer                            |    | Sequence                                               |
|-----------------------------------|----|--------------------------------------------------------|
| <b><i>pfor</i>-deletion</b>       | F1 | 5' <b>TTGTTCTAGA</b> ACCTGCAGACAGGAATGAAATTCCG3'       |
|                                   | R1 | 5'TAGTCGAAGAAGGAGTGATGGG3'                             |
|                                   | F2 | 5'ATCACTCCTTCTTCGACTAGAAACAATATCCTGCTGAAGC G3'         |
|                                   | R2 | 5' <b>TTGTGGATCC</b> GTATTATGAAAGCTACCGATCAGGCCAT3'    |
| <b><i>pfl4738</i>-deletion</b>    | F1 | 5' <b>TTGTTCTAGAT</b> CACGCTTCTTTTCCAGGGCCTTTC3'       |
|                                   | R1 | 5'TCTTCTGCCAACGCTTCGAGGC3'                             |
|                                   | F2 | 5'TCGAAGCGTTGGCAGAAGAGCTATACGATGCCATGGAGC3'            |
|                                   | R2 | 5' <b>TTGTGGATCC</b> ATCCTTGGGAACGGATTAAAGAATGCCC3'    |
| <b><i>pfl2955</i>-deletion</b>    | F1 | 5' <b>TTGTTCTAGA</b> ACCGCAACTCCAGTATATTGAAGAC3'       |
|                                   | R1 | 5' <b>CCACCCGTCC</b> ATAGTCATCTTC3'                    |
|                                   | F2 | 5'GATGACTATGGACGGGTGGAAGATCCTGCCGGATATCCGGAA3'         |
|                                   | R2 | 5' <b>TTGTGGATCC</b> ACTGAGCGAAACTCCAGATAATCAATTC3'    |
| <b><i>fdx</i>-deletion</b>        | F1 | 5' <b>TTGTTCTAGAT</b> TTTCGATTCGGAAAGCAAT3'            |
|                                   | R1 | 5'TTCGTTCCGGCAAAAATAAAGC3'                             |
|                                   | F2 | 5'TATTTTTGCCGAACGAAGTTTGCCCGTCTGAAGCTATT3'             |
|                                   | R2 | 5' <b>TTGTGTCGAC</b> CGAACATATCAATTATATCGGTGCACAT3'    |
| <b><i>rnf</i>-deletion</b>        | F1 | 5' <b>TTGTTCTAGACA</b> ATCTGAAATATATTGCGCAG3'          |
|                                   | R1 | 5' <b>CGATTCTCAC</b> CGACAGATGAG3'                     |
|                                   | F2 | 5'TCTGTCGGTGAGAATCGACCCTGGTGAAGATTCCGAA3'              |
|                                   | R2 | 5' <b>TTGTGTCGAC</b> ACCGGAAGCTATTGTATCACGGATAA3'      |
| <b><i>hyd1834</i>-deletion</b>    | F1 | 5' <b>TTGTTCTAGAC</b> CTCTTTATCACAAACTCCGGCA3'         |
|                                   | R1 | 5' <b>CTCAATAGGG</b> AGACGGTCAATTTTT3'                 |
|                                   | F2 | 5' <b>ACCGTCTCC</b> CTATTGAGACGACATTGTTTCAGGACGTC3'    |
|                                   | R2 | 5' <b>TTGTGTCGAC</b> TACAGACGGAAGATGGATAATAAAAAGGA3'   |
| <b><i>hyd3472</i>-deletion</b>    | F1 | 5' <b>TTGTTCTAGAG</b> AAAACAAGTATTACGAGTTCCCGGA3'      |
|                                   | R1 | 5' <b>AAAAGGCAGAA</b> AGCCAGGGA3'                      |
|                                   | F2 | 5'CTGGCTTTCTGCCTTTTTGCTCTGCCTATTGGGTCAC3'              |
|                                   | R2 | 5' <b>TTGTGTCGAC</b> GCATCAAAAGTTCCGCTTCATAGAAAGTACG3' |
| <b><i>pfor</i>-overexpression</b> | F  | 5' <b>ATACTCGAG</b> ACTAAACAGAAGAAATTCATCAC3'          |
|                                   | R  | 5' <b>ATAGGTAC</b> CTTATTCAGCTGTATCAGCTCC3'            |

886  
887  
888  
889  
890

**Supplementary Table 3. The primers used in this study.** The bold regions are restriction enzyme cut sites.
